# Supplementary material
Source: PubMed Central journal article supplement (PMC3869425)
Supplement: Supp_Data.pdf [file Supp_Data.pdf]

## Supplementary Data

### Statistical modeling of gene expression profiles

The log-fold change in gene expression was modeled by the following equation (32):

$$y_n(t) = \sum_m X_{nm} b_{nm} c_m(t) + \varepsilon_{nt}$$

Here,  $y_n(t)$  is the log-fold change for the  $n$ -th gene at time  $t$ ;  $X_{nm}$  is a binary matrix encoding the structure of the regulatory network (obtained typically from the literature);  $b_{nm}$  is the unknown rate constant for activation/repression;  $c_m(t)$  is the (log) fold-change in transcription factor (TF) activity; and  $\varepsilon_{nt}$  is an error term. Standard statistical inference techniques can then be employed using TFInfer (3), which is an implementation of the probabilistic model (32). This enables estimates of the changes in the activity of regulators from an analysis of the behavior of their targets.

TFInfer does not know *a priori* the sign of the TF–gene interactions, which means that the multiplying one or more of the inferred TF profiles by  $-1$  does not result in a worse solution according to the inference scheme in TFInfer. Only after the results have been generated, can this be corrected by comparing the inferred signs with information from databases on TF activity and flipping TF profiles where necessary, as well as the signs of its interactions.

### Significance testing for differences in TF activity

To test for significant differences in TF activity between two different conditions, we modified the model above to include data from the two conditions: that is,

$$y_{nr}(t) = \sum_m X_{nm} b_{nm} c_{mr}(t) + \varepsilon_{nrt}$$

where the added index,  $r$ , indexes the experimental conditions; the baseline expression  $\mu_n$  and coefficients  $b_{mn}$  are assumed to be common to both conditions. Then, for a given  $m$ , we assume that  $c_{m1}(t) = c_{m2}(t)$  for all timepoints  $t$ .

The inferred contribution of all TFs to the expression of all genes in the regulon of the given TF is then subtracted, leaving residuals,

$$y'_{nr}(t) = y_{nr}(t) - \sum_m X_{nm} b_{nm} c_{mr}(t)$$

which represents the normally distributed contribution of noise under the null hypothesis. The distribution of the differences of the residuals is in turn normally distributed. Thus, the distribution of

$$\frac{1}{2\sigma^2} \sum_n \sum_t (y'_{n1}(t) - y'_{n2}(t))^2$$

is chi-squared with degrees of freedom equal to the size of the regulon of the TF in question multiplied by the number of timepoints, where  $\sigma^2$  is the variance of the noise term  $\varepsilon_{nrt}$ . This gives a null distribution against which we can check the sums of the squares of the differences of the residuals from the data. The above procedure is repeated for all genes  $m$  to give a  $p$ -value for each TF in the network.

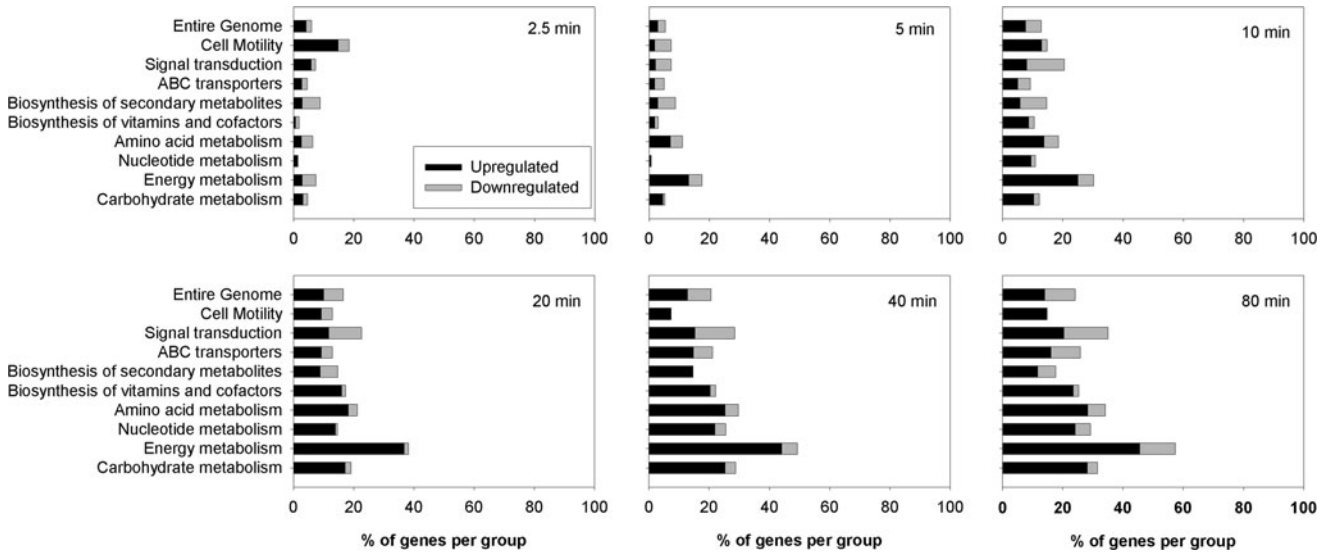

**SUPPLEMENTARY FIG. S1.** Expression changes of genes belonging to functional groups in response to Ru (CO)<sub>3</sub>Cl(Glycinate) (CORM-3) exposure under anaerobic conditions. Wild-type *Escherichia coli* cells were grown anaerobically in continuous culture and a defined minimal medium before addition of 40  $\mu$ M CORM-3. Samples were taken at 0, 2.5, 5, 10, 20, 40, and 80 min after addition of the compound and analyzed transcriptomically. The bars show the percentage of genes belonging to each group that were altered at each time point. Black bars indicate upregulation, and gray bars indicate downregulation.

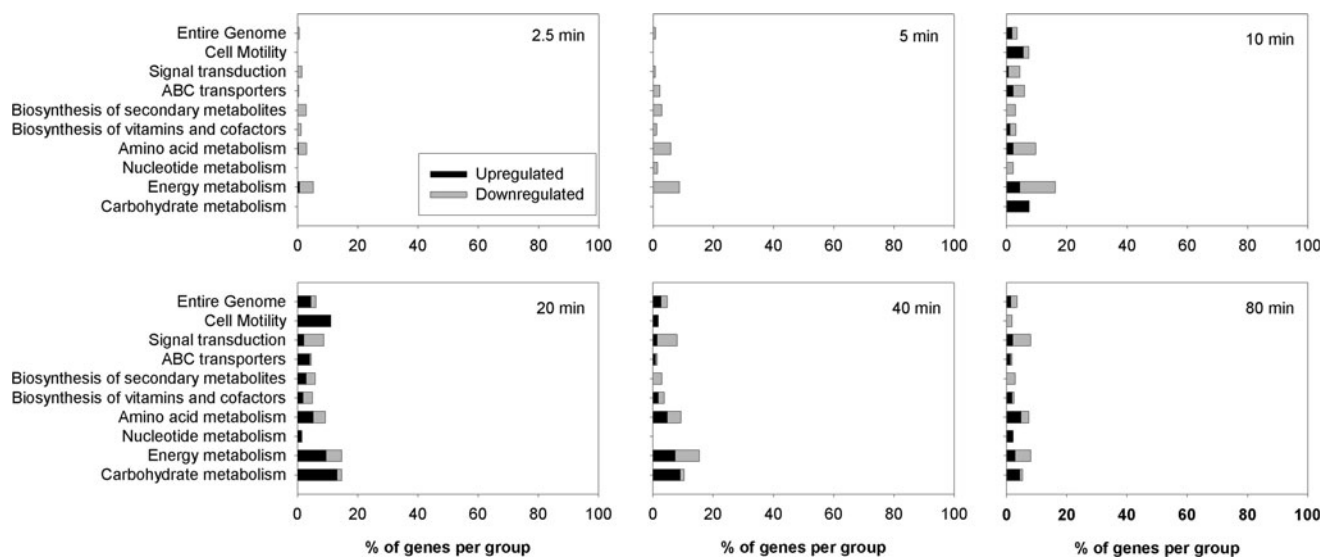

**SUPPLEMENTARY FIG. S2. Expression changes of genes belonging to functional groups in response to inactivated CORM-3 (iCORM-3) exposure under anaerobic conditions.** Wild-type *E. coli* cells were grown anaerobically in continuous culture and a defined minimal medium before addition of  $40 \mu\text{M}$  iCORM-3. Samples were taken at 0, 2.5, 5, 10, 20, 40, and 80 min after addition of the compound and analyzed transcriptomically. The bars show the percentage of genes belonging to each group that were altered at each time point. Black bars indicate upregulation, and gray bars indicate downregulation.

| Gene | CORM-3 time-course (min) |      |      |      |      |      | iCORM-3 time-course (min) |      |      |      |      |      |
|------|--------------------------|------|------|------|------|------|---------------------------|------|------|------|------|------|
|      | 2.5                      | 5    | 10   | 20   | 40   | 80   | 2.5                       | 5    | 10   | 20   | 40   | 80   |
| appB | 1.11                     | 1.11 | 0.86 | 0.94 | 0.95 | 0.90 | 0.99                      | 0.92 | 0.88 | 0.78 | 0.97 | 1.05 |
| appC | 0.98                     | 0.99 | 0.79 | 0.84 | 0.82 | 0.67 | 0.93                      | 0.95 | 0.89 | 0.79 | 0.90 | 1.08 |
| atpA | 1.03                     | 0.94 | 0.73 | 0.88 | 1.08 | 1.13 | 1.00                      | 1.10 | 1.09 | 1.12 | 1.01 | 0.95 |
| atpB | 0.90                     | 0.83 | 0.78 | 1.01 | 1.22 | 1.06 | 1.02                      | 1.03 | 0.97 | 0.94 | 1.07 | 0.97 |
| atpC | 1.05                     | 1.00 | 0.72 | 0.81 | 0.97 | 0.96 | 1.01                      | 1.06 | 1.15 | 1.28 | 1.11 | 1.11 |
| atpD | 1.03                     | 0.95 | 0.70 | 0.78 | 0.96 | 0.99 | 1.00                      | 1.03 | 1.10 | 1.22 | 1.07 | 1.05 |
| atpE | 0.95                     | 0.89 | 0.72 | 0.87 | 1.07 | 1.01 | 1.09                      | 1.07 | 1.05 | 1.03 | 1.07 | 1.00 |
| atpF | 0.97                     | 0.91 | 0.71 | 0.83 | 1.07 | 0.96 | 1.16                      | 1.16 | 1.18 | 1.18 | 1.11 | 1.06 |
| atpG | 1.01                     | 0.97 | 0.80 | 0.83 | 1.04 | 1.08 | 0.98                      | 1.12 | 1.13 | 1.10 | 0.99 | 0.93 |
| atpH | 1.04                     | 0.90 | 0.72 | 0.81 | 1.10 | 1.13 | 1.01                      | 1.02 | 1.03 | 1.04 | 1.06 | 0.91 |
| cydA | 1.83                     | 1.43 | 0.40 | 0.29 | 0.34 | 0.35 | 1.09                      | 0.87 | 0.77 | 0.80 | 1.33 | 0.77 |
| cydB | 2.01                     | 1.91 | 0.54 | 0.39 | 0.45 | 0.45 | 1.05                      | 0.97 | 0.79 | 0.82 | 1.64 | 0.85 |
| cyoA | 0.61                     | 0.21 | 0.04 | 0.04 | 0.03 | 0.02 | 1.05                      | 1.06 | 1.06 | 1.03 | 0.80 | 0.84 |
| cyoB | 0.78                     | 0.37 | 0.07 | 0.04 | 0.04 | 0.04 | 1.11                      | 1.21 | 1.13 | 1.13 | 0.84 | 0.96 |
| cyoC | 0.78                     | 0.40 | 0.06 | 0.03 | 0.03 | 0.03 | 1.17                      | 1.23 | 1.08 | 1.08 | 0.84 | 0.97 |
| cyoD | 0.87                     | 0.45 | 0.08 | 0.04 | 0.04 | 0.03 | 1.17                      | 1.20 | 1.07 | 1.12 | 0.86 | 1.00 |
| cyoE | 0.85                     | 0.49 | 0.10 | 0.06 | 0.05 | 0.05 | 1.16                      | 1.17 | 1.00 | 1.04 | 0.96 | 1.03 |
| frdA | 1.05                     | 1.00 | 0.81 | 0.61 | 0.42 | 0.40 | 0.95                      | 0.96 | 0.87 | 0.82 | 0.84 | 0.80 |
| frdB | 1.01                     | 1.07 | 0.93 | 0.70 | 0.43 | 0.39 | 0.93                      | 1.02 | 0.91 | 0.86 | 0.85 | 0.85 |
| frdC | 1.06                     | 1.10 | 0.92 | 0.73 | 0.49 | 0.43 | 1.02                      | 1.09 | 0.93 | 0.90 | 0.95 | 0.92 |
| frdD | 1.11                     | 1.19 | 1.03 | 0.83 | 0.65 | 0.60 | 1.09                      | 1.19 | 0.99 | 0.92 | 0.96 | 0.91 |
| ndh  | 1.16                     | 1.53 | 1.80 | 1.57 | 1.64 | 1.60 | 1.08                      | 1.06 | 1.11 | 1.01 | 1.06 | 0.86 |
| nuoA | 0.88                     | 0.68 | 0.52 | 0.31 | 0.22 | 0.34 | 1.00                      | 0.92 | 0.98 | 1.03 | 0.97 | 0.92 |
| nuoB | 0.87                     | 0.68 | 0.47 | 0.28 | 0.22 | 0.32 | 0.95                      | 0.95 | 1.00 | 1.03 | 0.94 | 0.89 |
| nuoC | 0.92                     | 0.76 | 0.49 | 0.26 | 0.19 | 0.29 | 0.92                      | 1.05 | 1.10 | 1.14 | 0.91 | 0.92 |
| nuoE | 0.91                     | 0.75 | 0.47 | 0.23 | 0.15 | 0.23 | 0.96                      | 1.03 | 1.06 | 1.11 | 0.93 | 0.96 |
| nuoF | 0.93                     | 0.76 | 0.55 | 0.29 | 0.20 | 0.34 | 0.98                      | 1.08 | 1.06 | 1.10 | 0.95 | 0.98 |
| nuoG | 0.88                     | 0.81 | 0.63 | 0.31 | 0.18 | 0.26 | 1.00                      | 1.00 | 1.15 | 1.20 | 0.95 | 1.03 |
| nuoH | 0.97                     | 0.90 | 0.65 | 0.35 | 0.21 | 0.31 | 1.03                      | 0.96 | 1.11 | 1.16 | 0.90 | 1.01 |
| nuoI | 0.96                     | 0.93 | 0.72 | 0.37 | 0.20 | 0.29 | 1.03                      | 0.96 | 1.08 | 1.15 | 0.91 | 1.01 |
| nuoJ | 0.94                     | 0.91 | 0.69 | 0.39 | 0.23 | 0.33 | 1.08                      | 0.98 | 1.12 | 1.19 | 0.97 | 1.06 |
| nuoK | 0.97                     | 0.96 | 0.79 | 0.43 | 0.22 | 0.34 | 1.05                      | 0.98 | 1.09 | 1.16 | 0.95 | 1.01 |
| nuoL | 0.95                     | 0.96 | 0.84 | 0.41 | 0.23 | 0.35 | 1.02                      | 0.95 | 1.16 | 1.23 | 0.95 | 1.02 |
| nuoM | 1.02                     | 1.00 | 0.94 | 0.47 | 0.28 | 0.35 | 1.02                      | 1.03 | 1.22 | 1.22 | 0.99 | 1.03 |
| nuoN | 0.96                     | 0.98 | 0.93 | 0.47 | 0.27 | 0.30 | 1.01                      | 1.03 | 1.12 | 1.17 | 1.00 | 1.06 |
| ppa  | 0.85                     | 0.89 | 0.91 | 1.04 | 1.10 | 0.98 | 0.89                      | 0.95 | 0.94 | 0.99 | 1.05 | 1.04 |
| ppk  | 0.94                     | 0.93 | 0.99 | 1.08 | 1.39 | 1.55 | 0.92                      | 0.96 | 1.03 | 0.98 | 0.99 | 0.95 |
| sdhA | 0.54                     | 0.27 | 0.07 | 0.03 | 0.02 | 0.02 | 0.90                      | 1.32 | 1.30 | 1.28 | 0.80 | 1.05 |
| sdhB | 0.52                     | 0.27 | 0.08 | 0.03 | 0.03 | 0.03 | 0.93                      | 1.26 | 1.27 | 1.30 | 0.74 | 1.04 |

SUPPLEMENTARY FIG. S3. Differential expression of genes involved in oxidative phosphorylation after aerobic exposure to iCORM-3. The color-scale bar shows mean fold changes in individual genes of *E. coli* grown aerobically in Evans medium after the addition of 40  $\mu$ M CORM-3 or iCORM-3.

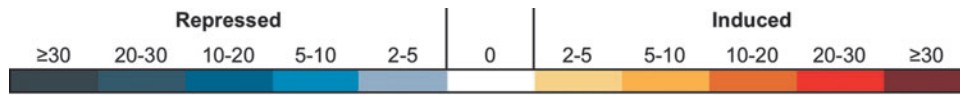

| Aerobic Fold change of genes involved in the TCA cycle |                          |      |      |      |      |      |                           |      |      |      |      |      |
|--------------------------------------------------------|--------------------------|------|------|------|------|------|---------------------------|------|------|------|------|------|
| Gene                                                   | CORM-3 time-course (min) |      |      |      |      |      | iCORM-3 time-course (min) |      |      |      |      |      |
|                                                        | 2.5                      | 5    | 10   | 20   | 40   | 80   | 2.5                       | 5    | 10   | 20   | 40   | 80   |
| acnA                                                   | 0.69                     | 0.54 | 0.26 | 0.10 | 0.06 | 0.06 | 1.03                      | 0.94 | 0.79 | 0.93 | 1.07 | 1.31 |
| acnB                                                   | 0.56                     | 0.39 | 0.18 | 0.09 | 0.08 | 0.09 | 1.08                      | 0.91 | 1.14 | 1.33 | 0.89 | 1.07 |
| citD                                                   | 0.70                     | 1.27 | 1.02 | 1.54 | 1.60 | 1.31 | 0.99                      | 0.95 | 0.92 | 0.90 | 1.03 | 0.91 |
| citE                                                   | 1.41                     | 1.23 | 1.29 | 1.38 | 1.07 | 1.34 | 1.04                      | 1.30 | 1.13 | 1.18 | 1.15 | 1.61 |
| citF                                                   | 0.92                     | 1.16 | 1.63 | 1.21 | 1.31 | 1.38 | 0.96                      | 0.85 | 1.00 | 0.93 | 0.95 | 1.04 |
| frdA                                                   | 1.05                     | 1.00 | 0.81 | 0.61 | 0.42 | 0.40 | 0.95                      | 0.96 | 0.87 | 0.82 | 0.84 | 0.80 |
| frdB                                                   | 1.01                     | 1.07 | 0.93 | 0.70 | 0.43 | 0.39 | 0.93                      | 1.02 | 0.91 | 0.86 | 0.85 | 0.85 |
| frdC                                                   | 1.06                     | 1.10 | 0.92 | 0.73 | 0.49 | 0.43 | 1.02                      | 1.09 | 0.93 | 0.90 | 0.95 | 0.92 |
| frdD                                                   | 1.11                     | 1.19 | 1.03 | 0.83 | 0.65 | 0.60 | 1.09                      | 1.19 | 0.99 | 0.92 | 0.96 | 0.91 |
| fumA                                                   | 0.63                     | 0.37 | 0.14 | 0.09 | 0.07 | 0.07 | 0.99                      | 1.24 | 1.11 | 1.00 | 0.77 | 0.89 |
| fumB                                                   | 0.82                     | 0.60 | 0.47 | 0.45 | 0.36 | 0.38 | 1.08                      | 1.22 | 1.26 | 1.04 | 0.80 | 0.90 |
| fumC                                                   | 0.70                     | 0.37 | 0.12 | 0.11 | 0.10 | 0.09 | 0.91                      | 1.19 | 1.20 | 1.31 | 0.82 | 0.88 |
| gltA                                                   | 0.59                     | 0.49 | 0.37 | 0.23 | 0.13 | 0.14 | 1.04                      | 1.04 | 1.12 | 1.23 | 0.94 | 1.29 |
| icd                                                    | 0.68                     | 0.51 | 0.31 | 0.28 | 0.33 | 0.38 | 1.14                      | 1.04 | 1.08 | 1.25 | 1.01 | 1.11 |
| lpd                                                    | 0.80                     | 0.63 | 0.37 | 0.15 | 0.09 | 0.10 | 0.95                      | 0.96 | 1.01 | 1.14 | 0.90 | 0.94 |
| mdh                                                    | 0.82                     | 0.72 | 0.47 | 0.23 | 0.11 | 0.11 | 0.99                      | 0.91 | 0.95 | 1.08 | 1.02 | 1.07 |
| pck                                                    | 0.96                     | 0.89 | 0.66 | 0.34 | 0.15 | 0.21 | 0.95                      | 0.99 | 0.97 | 1.02 | 0.88 | 0.94 |
| sdhA                                                   | 0.54                     | 0.27 | 0.07 | 0.03 | 0.02 | 0.02 | 0.90                      | 1.32 | 1.30 | 1.28 | 0.80 | 1.05 |
| sdhB                                                   | 0.52                     | 0.27 | 0.08 | 0.03 | 0.03 | 0.03 | 0.93                      | 1.26 | 1.27 | 1.30 | 0.74 | 1.04 |
| sdhC                                                   | 0.45                     | 0.18 | 0.05 | 0.03 | 0.02 | 0.02 | 0.99                      | 1.15 | 1.19 | 1.14 | 0.77 | 0.94 |
| sdhD                                                   | 0.47                     | 0.20 | 0.06 | 0.03 | 0.02 | 0.02 | 0.99                      | 1.16 | 1.18 | 1.12 | 0.76 | 0.93 |
| sucA                                                   | 0.70                     | 0.43 | 0.13 | 0.08 | 0.08 | 0.09 | 0.92                      | 1.01 | 1.26 | 1.27 | 0.74 | 1.04 |
| sucB                                                   | 0.71                     | 0.46 | 0.13 | 0.08 | 0.07 | 0.07 | 1.01                      | 0.91 | 1.19 | 1.34 | 0.74 | 1.04 |
| sucC                                                   | 0.72                     | 0.58 | 0.15 | 0.06 | 0.05 | 0.05 | 0.99                      | 0.82 | 1.20 | 1.44 | 0.70 | 1.06 |
| sucD                                                   | 0.70                     | 0.64 | 0.18 | 0.08 | 0.06 | 0.05 | 1.02                      | 0.91 | 1.20 | 1.52 | 0.75 | 1.19 |
| ybiC                                                   | 0.70                     | 0.56 | 0.42 | 0.37 | 0.31 | 0.32 | 0.95                      | 0.88 | 0.93 | 1.11 | 1.04 | 1.03 |

**SUPPLEMENTARY FIG. S4. Differential expression of genes involved in the tricarboxylic (TCA) cycle after aerobic exposure to iCORM-3.** The color-scale bar shows mean fold changes in individual genes of *E. coli* grown aerobically in Evans medium after the addition of 40  $\mu$ M CORM-3 or iCORM-3.

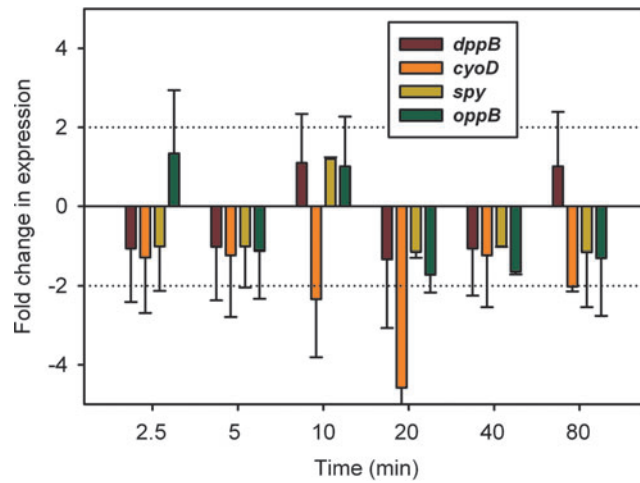

**SUPPLEMENTARY FIG. S5. Differential expression of genes after exposure to CO gas.** *E. coli* cultures grown continuously in Evans medium were exposed to  $50 \text{ ml} \cdot \text{min}^{-1}$  CO gas. Cell samples were extracted immediately before and at several times after turning on the CO gas flow. RNA extracted from the samples was processed for real time PCR analysis of the changes in expression level of the genes *dppB*, *cyoD*, *spy*, and *oppB*. Gene expression changes of less than twofold were deemed insignificant.  $N=2$  biological repeats  $\pm$  standard error of the mean.

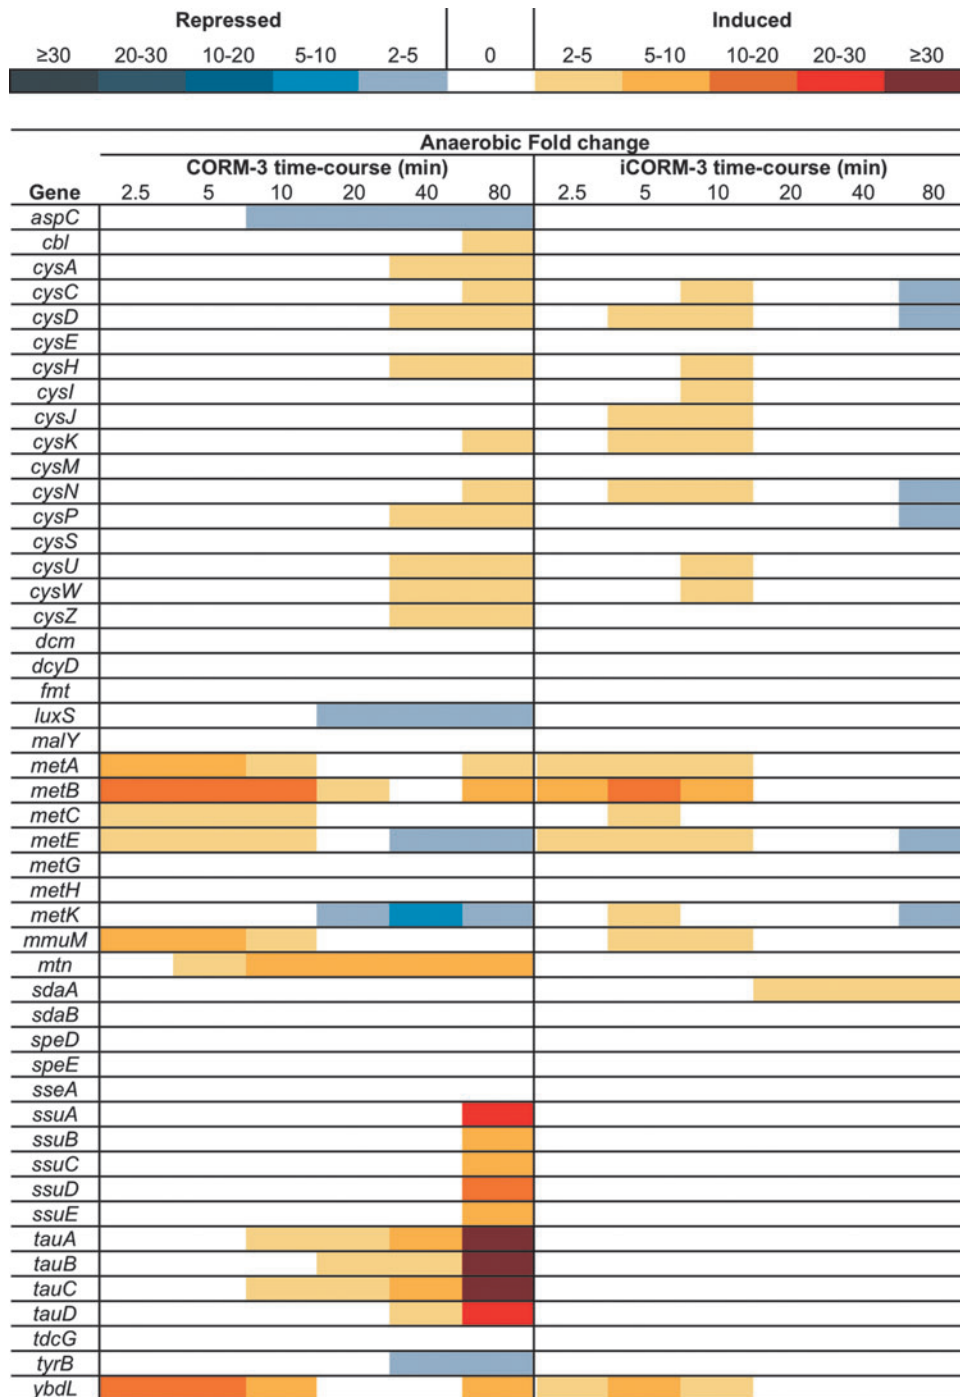

**SUPPLEMENTARY FIG. S6. Differential expression of genes involved in sulfate transport and metabolism.** The color-scale bar shows mean fold changes in individual genes of *E. coli* grown anaerobically in Evans medium after the addition of 40  $\mu$ M CORM-3 or iCORM-3.

SUPPLEMENTARY TABLE S1A. MEAN ACTIVITY PROFILES FOR ALL TRANSCRIPTION FACTORS UNDER EXPOSURE TO CORM-3 IN AEROBIC GROWTH CONDITIONS

| Transcription factor name | Time (min) |         |         |         |         |         |         |
|---------------------------|------------|---------|---------|---------|---------|---------|---------|
|                           | 0          | 2.5     | 5       | 10      | 20      | 40      | 80      |
| AraC                      | -0.0375    | -0.1158 | -0.1976 | -0.1709 | 0.1032  | 0.3430  | 0.3194  |
| ArcA                      | -0.0078    | -0.3785 | -1.0034 | -1.5690 | -1.4358 | -1.4530 | -1.5768 |
| CpxR                      | 0.0102     | 1.2877  | 2.0750  | 2.8660  | 2.9912  | 3.1667  | 3.1944  |
| CRP                       | -0.0011    | -0.3191 | -0.6597 | -1.3364 | -1.6404 | -1.9034 | -1.8769 |
| CusR                      | -0.0408    | -2.0635 | -2.5208 | -2.3905 | -1.7917 | -1.3532 | -1.0940 |
| DgsA                      | -0.0038    | -0.0488 | -0.1101 | -0.2967 | -0.8353 | -1.4055 | -1.0270 |
| EvgA                      | -0.0141    | -0.1191 | -0.4179 | -0.9093 | -0.9348 | -0.9164 | -0.7216 |
| Fis                       | -0.0134    | -0.2268 | -0.4658 | -0.7798 | -0.8546 | -0.8832 | -0.8767 |
| FlhDC                     | 0.0043     | 0.1122  | 0.3088  | 0.6095  | 0.9657  | 1.5041  | 1.8917  |
| FNR                       | 0.0049     | 0.0634  | 0.1465  | 0.3038  | 0.3897  | 0.5156  | 0.5370  |
| FruR                      | -0.0149    | -0.0795 | 0.0508  | 0.4359  | 0.7075  | 0.8480  | 0.8158  |
| Fur                       | 0.0299     | 0.1702  | 0.2304  | 0.2836  | 0.4117  | 0.5155  | 0.5758  |
| GadE                      | 0.0000     | 0.0000  | 0.0000  | 0.0000  | 0.0000  | 0.0000  | 0.0000  |
| GadWX                     | -0.0090    | -0.2137 | -0.3089 | -0.6237 | -1.1218 | -1.7434 | -2.5133 |
| GalR                      | -0.0510    | -0.0786 | -0.1270 | -0.1910 | -0.2548 | -0.3022 | -0.3325 |
| GalS                      | 0.0000     | 0.0000  | 0.0000  | 0.0000  | 0.0000  | 0.0000  | 0.0000  |
| GcvA                      | -0.0270    | -2.1923 | -2.5217 | -2.5920 | -2.5053 | -0.5966 | -0.4368 |
| GlcC                      | -0.0691    | -0.5447 | -0.9962 | -1.4801 | -1.6028 | -1.5984 | -1.7161 |
| HNS                       | -0.0103    | -0.1771 | -0.3647 | -0.6842 | -0.8975 | -1.0229 | -1.0366 |
| IclR                      | -0.1002    | -0.3720 | -0.7172 | -1.1589 | -1.4212 | -1.3820 | -1.5543 |
| IHF                       | -0.0020    | -0.0893 | -0.0528 | 0.1120  | 0.5889  | 1.2222  | 1.0637  |
| IscR                      | 0.0079     | 0.1751  | 0.4817  | 0.9980  | 1.2128  | 1.3772  | 1.2905  |
| Lrp                       | 0.0039     | 0.1255  | 0.2635  | 0.6298  | 1.0200  | 1.3419  | 1.3948  |
| MalT                      | -0.0005    | -0.0107 | -0.0364 | -0.0868 | -0.9450 | -1.8497 | -1.7347 |
| MarA                      | -0.0282    | -0.1847 | -0.4897 | -0.9625 | -1.1151 | -1.2072 | -1.2609 |
| MhpR                      | 0.0000     | 0.0000  | 0.0000  | 0.0000  | 0.0000  | 0.0000  | 0.0000  |
| ModE                      | 0.0026     | 0.0139  | 0.0821  | 0.1902  | 0.3555  | 0.4738  | 0.3944  |
| Nac                       | 0.0000     | 0.0000  | 0.0000  | 0.0000  | 0.0000  | 0.0000  | 0.0000  |
| NarL                      | 0.0046     | 0.0374  | 0.0261  | -0.0350 | -0.2347 | -0.4194 | -0.4280 |
| NarP                      | 0.0000     | 0.0000  | 0.0000  | 0.0000  | 0.0000  | 0.0000  | 0.0000  |
| NtrC                      | -0.0064    | -0.0126 | -0.0724 | -0.9549 | -2.4091 | -3.0001 | -2.8697 |
| OmpR                      | 0.0649     | 0.3120  | 0.6075  | 0.9476  | 0.9066  | 0.7141  | 0.6702  |
| PdhR                      | -0.0056    | -0.0144 | 0.1893  | 1.1883  | 2.1385  | 2.4406  | 2.3022  |
| PhoP                      | -0.0405    | -0.6730 | -1.1429 | -1.5569 | -1.7711 | -1.7381 | -1.4890 |
| RstA                      | 0.0049     | 0.0070  | -0.0212 | -0.1537 | -0.4565 | -1.2126 | -2.1338 |
| YdeO                      | 0.0000     | 0.0000  | 0.0000  | 0.0000  | 0.0000  | 0.0000  | 0.0000  |

CORM-3, Ru(CO)<sub>3</sub>Cl(glycinate).

SUPPLEMENTARY TABLE S1B. ERRORS (TWO STANDARD DEVIATIONS) FOR ALL TRANSCRIPTION FACTORS EXPOSED TO CORM-3 UNDER AEROBIC GROWTH CONDITIONS

| <i>Transcription factor name</i> | <i>Time (min)</i> |        |        |        |        |        |        |
|----------------------------------|-------------------|--------|--------|--------|--------|--------|--------|
|                                  | 0                 | 2.5    | 5      | 10     | 20     | 40     | 80     |
| AraC                             | 0.2503            | 0.2256 | 0.2238 | 0.2237 | 0.2238 | 0.2256 | 0.2503 |
| ArcA                             | 0.1059            | 0.1049 | 0.1049 | 0.1049 | 0.1049 | 0.1049 | 0.1059 |
| CpxR                             | 0.1089            | 0.1085 | 0.1085 | 0.1085 | 0.1085 | 0.1085 | 0.1089 |
| CRP                              | 0.0478            | 0.0476 | 0.0476 | 0.0476 | 0.0476 | 0.0476 | 0.0478 |
| CusR                             | 0.2315            | 0.2299 | 0.2299 | 0.2299 | 0.2299 | 0.2299 | 0.2315 |
| DgsA                             | 0.2408            | 0.2326 | 0.2326 | 0.2326 | 0.2326 | 0.2326 | 0.2408 |
| EvgA                             | 0.1998            | 0.1904 | 0.1903 | 0.1903 | 0.1903 | 0.1904 | 0.1998 |
| Fis                              | 0.0940            | 0.0916 | 0.0916 | 0.0916 | 0.0916 | 0.0916 | 0.0940 |
| FlhDC                            | 0.1431            | 0.1407 | 0.1407 | 0.1407 | 0.1407 | 0.1407 | 0.1431 |
| FNR                              | 0.0764            | 0.0740 | 0.0740 | 0.0740 | 0.0740 | 0.0740 | 0.0764 |
| FruR                             | 0.1448            | 0.1386 | 0.1385 | 0.1385 | 0.1385 | 0.1386 | 0.1448 |
| Fur                              | 0.1221            | 0.1138 | 0.1136 | 0.1136 | 0.1136 | 0.1138 | 0.1221 |
| GadE                             | 0.1916            | 0.1700 | 0.1678 | 0.1675 | 0.1678 | 0.1700 | 0.1916 |
| GadWX                            | 0.1986            | 0.1955 | 0.1955 | 0.1955 | 0.1955 | 0.1955 | 0.1986 |
| GalR                             | 0.2757            | 0.2396 | 0.2303 | 0.2285 | 0.2303 | 0.2396 | 0.2757 |
| GalS                             | 0.2914            | 0.2534 | 0.2424 | 0.2402 | 0.2424 | 0.2534 | 0.2914 |
| GcvA                             | 0.2246            | 0.2238 | 0.2238 | 0.2238 | 0.2238 | 0.2238 | 0.2246 |
| GlcC                             | 0.2762            | 0.2630 | 0.2628 | 0.2628 | 0.2628 | 0.2630 | 0.2762 |
| HNS                              | 0.0949            | 0.0926 | 0.0926 | 0.0926 | 0.0926 | 0.0926 | 0.0949 |
| IclR                             | 0.3830            | 0.3515 | 0.3498 | 0.3498 | 0.3498 | 0.3515 | 0.3830 |
| IHF                              | 0.0620            | 0.0618 | 0.0618 | 0.0618 | 0.0618 | 0.0618 | 0.0620 |
| IscR                             | 0.1507            | 0.1466 | 0.1466 | 0.1466 | 0.1466 | 0.1466 | 0.1507 |
| Lrp                              | 0.1291            | 0.1262 | 0.1262 | 0.1262 | 0.1262 | 0.1262 | 0.1291 |
| MalT                             | 0.2429            | 0.2384 | 0.2384 | 0.2384 | 0.2384 | 0.2384 | 0.2429 |
| MarA                             | 0.2192            | 0.2074 | 0.2072 | 0.2072 | 0.2072 | 0.2074 | 0.2192 |
| MhpR                             | 0.2914            | 0.2534 | 0.2424 | 0.2402 | 0.2424 | 0.2534 | 0.2914 |
| ModE                             | 0.1147            | 0.1076 | 0.1074 | 0.1074 | 0.1074 | 0.1076 | 0.1147 |
| Nac                              | 0.4046            | 0.3600 | 0.3396 | 0.3338 | 0.3396 | 0.3600 | 0.4046 |
| NarL                             | 0.0995            | 0.0946 | 0.0946 | 0.0946 | 0.0946 | 0.0946 | 0.0995 |
| NarP                             | 0.1300            | 0.1204 | 0.1201 | 0.1201 | 0.1201 | 0.1204 | 0.1300 |
| NtrC                             | 0.2192            | 0.2171 | 0.2171 | 0.2171 | 0.2171 | 0.2171 | 0.2192 |
| OmpR                             | 0.2604            | 0.2413 | 0.2406 | 0.2406 | 0.2406 | 0.2413 | 0.2604 |
| PdhR                             | 0.2183            | 0.2152 | 0.2152 | 0.2152 | 0.2152 | 0.2152 | 0.2183 |
| PhoP                             | 0.2023            | 0.1972 | 0.1972 | 0.1972 | 0.1972 | 0.1972 | 0.2023 |
| RstA                             | 0.3045            | 0.2965 | 0.2965 | 0.2965 | 0.2965 | 0.2965 | 0.3045 |
| YdeO                             | 0.4046            | 0.3600 | 0.3396 | 0.3338 | 0.3396 | 0.3600 | 0.4046 |



SUPPLEMENTARY TABLE S2A. MEAN ACTIVITY PROFILES FOR ALL TRANSCRIPTION FACTORS UNDER EXPOSURE TO iCORM-3 IN AEROBIC GROWTH CONDITIONS

| <i>Transcription factor name</i> | <i>Time (min)</i> |         |         |         |         |         |         |
|----------------------------------|-------------------|---------|---------|---------|---------|---------|---------|
|                                  | 0                 | 2.5     | 5       | 10      | 20      | 40      | 80      |
| AraC                             | 0.0344            | 0.0632  | 0.1993  | 0.2964  | 0.4324  | 0.5317  | 0.5219  |
| ArcA                             | -0.0072           | 0.1140  | 0.3571  | 0.5702  | 0.5041  | -0.6695 | 0.0362  |
| CpxR                             | -0.0230           | -0.4315 | -0.7029 | -0.9524 | -1.1929 | -1.2993 | -1.4339 |
| CRP                              | 0.0107            | 0.2972  | 0.5886  | 0.6042  | 0.3863  | 0.0881  | 0.0613  |
| CusR                             | 0.0064            | 0.0767  | 0.2624  | 0.3074  | 0.3611  | 1.4230  | 1.8673  |
| DgsA                             | -0.1435           | -0.2629 | -0.3002 | -0.2902 | -0.3160 | -0.3940 | -0.4306 |
| EvgA                             | 0.0175            | 0.3860  | -0.0482 | 0.3331  | 0.2202  | -0.6825 | -0.9338 |
| Fis                              | -0.0211           | -0.1571 | -0.2828 | -0.3788 | -0.4435 | -0.6537 | -0.3597 |
| FlhDC                            | 0.0060            | 0.1454  | -0.3799 | -0.7532 | -0.8838 | -0.4385 | -0.0049 |
| FNR                              | 0.0153            | 0.1756  | 0.0932  | 0.2786  | 0.4304  | 0.3981  | 0.6080  |
| FruR                             | 0.0578            | 0.2268  | 0.3003  | 0.3521  | 0.2162  | 0.0718  | -0.0129 |
| Fur                              | -0.0129           | -0.2449 | 0.1054  | -0.3225 | -0.2586 | -0.5001 | -0.2467 |
| GadE                             | 0.0326            | 0.4645  | 0.7897  | 1.0726  | 1.4276  | 1.1069  | 0.8841  |
| GadWX                            | 0.0733            | 0.1772  | 0.3387  | 0.4754  | 0.6446  | 0.6882  | 0.6489  |
| GalR                             | 0.0000            | 0.0000  | 0.0000  | 0.0000  | 0.0000  | 0.0000  | 0.0000  |
| GalS                             | -0.1210           | -0.1950 | -0.2629 | -0.3462 | -0.4927 | -0.5994 | -0.6277 |
| GcvA                             | -0.0140           | -3.3009 | -3.6403 | -3.7035 | -0.5600 | 0.0223  | 0.1042  |
| GlcC                             | -0.2607           | -0.3854 | -0.3865 | -0.3652 | -0.3756 | -0.3812 | -0.3369 |
| HNS                              | 0.0436            | 0.3612  | 0.4940  | 0.6300  | 0.5620  | 0.3667  | 0.1630  |
| IclR                             | 0.2348            | 0.2790  | 0.3174  | 0.3403  | 0.3254  | 0.3500  | 0.3892  |
| IHF                              | -0.0011           | 0.1786  | -0.3810 | -0.8515 | -0.8548 | 0.0025  | 0.1747  |
| IscR                             | -0.0309           | -0.3973 | -0.5041 | -0.8090 | -1.0483 | -0.6137 | -0.7131 |
| Lrp                              | 0.0037            | 0.2689  | 1.2866  | 1.3686  | 0.3871  | -0.1614 | -0.0636 |
| MalT                             | -0.0676           | -0.4361 | -0.7291 | -0.6845 | -1.0627 | -0.7701 | -0.5687 |
| MarA                             | -0.0235           | -0.1145 | -0.3028 | -0.4290 | -0.4911 | -0.0812 | -0.0153 |
| MhpR                             | 0.0000            | 0.0000  | 0.0000  | 0.0000  | 0.0000  | 0.0000  | 0.0000  |
| ModE                             | 0.0017            | 0.0140  | -0.0252 | -0.0993 | -0.1277 | -0.1953 | -0.2680 |
| Nac                              | -0.0178           | -0.5754 | -1.2341 | -2.1660 | -2.6450 | -1.3003 | 0.1590  |
| NarL                             | -0.0143           | -0.0794 | -0.0628 | -0.1152 | -0.1734 | -0.2046 | -0.2520 |
| NarP                             | -0.0161           | -0.5332 | -1.0383 | -0.4148 | -0.1167 | 0.2095  | 0.4814  |
| NtrC                             | -0.0038           | -0.9136 | -1.4144 | -0.4231 | 0.7601  | 1.0157  | 0.7029  |
| OmpR                             | 0.0267            | 0.1823  | 0.4082  | 0.3388  | -0.0197 | -0.3517 | -0.6866 |
| PdhR                             | 0.0870            | 0.1628  | 0.1965  | 0.1444  | 0.1261  | 0.1780  | 0.2037  |
| PhoP                             | -0.0597           | -0.1407 | -0.3275 | -0.4131 | -0.5052 | -0.5485 | -0.5512 |
| RstA                             | 0.0000            | 0.0000  | 0.0000  | 0.0000  | 0.0000  | 0.0000  | 0.0000  |
| YdeO                             | 0.0000            | 0.0000  | 0.0000  | 0.0000  | 0.0000  | 0.0000  | 0.0000  |

iCORM-3, inactivated CORM-3.

SUPPLEMENTARY TABLE S2B. ERRORS (TWO STANDARD DEVIATIONS) FOR ALL TRANSCRIPTION FACTORS EXPOSED TO iCORM-3 UNDER AEROBIC GROWTH CONDITIONS

| <i>Transcription factor name</i> | <i>Time (min)</i> |        |        |        |        |        |        |
|----------------------------------|-------------------|--------|--------|--------|--------|--------|--------|
|                                  | 0                 | 2.5    | 5      | 10     | 20     | 40     | 80     |
| AraC                             | 0.2360            | 0.2060 | 0.2005 | 0.1997 | 0.2005 | 0.2060 | 0.2360 |
| ArcA                             | 0.1154            | 0.1149 | 0.1148 | 0.1148 | 0.1148 | 0.1149 | 0.1154 |
| CpxR                             | 0.1327            | 0.1291 | 0.1291 | 0.1291 | 0.1291 | 0.1291 | 0.1327 |
| CRP                              | 0.0513            | 0.0505 | 0.0505 | 0.0505 | 0.0505 | 0.0505 | 0.0513 |
| CusR                             | 0.3191            | 0.3091 | 0.3090 | 0.3090 | 0.3090 | 0.3091 | 0.3191 |
| DgsA                             | 0.2336            | 0.2040 | 0.1987 | 0.1980 | 0.1987 | 0.2040 | 0.2336 |
| EvgA                             | 0.2326            | 0.2282 | 0.2282 | 0.2282 | 0.2282 | 0.2282 | 0.2326 |
| Fis                              | 0.1012            | 0.0960 | 0.0959 | 0.0959 | 0.0959 | 0.0960 | 0.1012 |
| FlhDC                            | 0.1648            | 0.1619 | 0.1619 | 0.1619 | 0.1619 | 0.1619 | 0.1648 |
| FNR                              | 0.0832            | 0.0801 | 0.0801 | 0.0801 | 0.0801 | 0.0801 | 0.0832 |
| FruR                             | 0.1455            | 0.1331 | 0.1325 | 0.1325 | 0.1325 | 0.1331 | 0.1455 |
| Fur                              | 0.1410            | 0.1378 | 0.1378 | 0.1378 | 0.1378 | 0.1378 | 0.1410 |
| GadE                             | 0.2160            | 0.2083 | 0.2083 | 0.2083 | 0.2083 | 0.2083 | 0.2160 |
| GadWX                            | 0.1967            | 0.1741 | 0.1715 | 0.1713 | 0.1715 | 0.1741 | 0.1967 |
| GalR                             | 0.3074            | 0.2676 | 0.2550 | 0.2522 | 0.2550 | 0.2676 | 0.3074 |
| GalS                             | 0.2611            | 0.2270 | 0.2192 | 0.2178 | 0.2192 | 0.2270 | 0.2611 |
| GcvA                             | 0.1801            | 0.1799 | 0.1799 | 0.1799 | 0.1799 | 0.1799 | 0.1801 |
| GlcC                             | 0.2889            | 0.2511 | 0.2404 | 0.2383 | 0.2404 | 0.2511 | 0.2889 |
| HNS                              | 0.0975            | 0.0928 | 0.0928 | 0.0928 | 0.0928 | 0.0928 | 0.0975 |
| IclR                             | 0.3963            | 0.3518 | 0.3319 | 0.3263 | 0.3319 | 0.3518 | 0.3963 |
| IHF                              | 0.0686            | 0.0685 | 0.0685 | 0.0685 | 0.0685 | 0.0685 | 0.0686 |
| IscR                             | 0.1681            | 0.1631 | 0.1630 | 0.1630 | 0.1630 | 0.1631 | 0.1681 |
| Lrp                              | 0.1537            | 0.1529 | 0.1529 | 0.1529 | 0.1529 | 0.1529 | 0.1537 |
| MalT                             | 0.2780            | 0.2616 | 0.2613 | 0.2612 | 0.2613 | 0.2616 | 0.2780 |
| MarA                             | 0.2435            | 0.2244 | 0.2236 | 0.2236 | 0.2236 | 0.2244 | 0.2435 |
| MhpR                             | 0.3074            | 0.2676 | 0.2550 | 0.2522 | 0.2550 | 0.2676 | 0.3074 |
| ModE                             | 0.1284            | 0.1191 | 0.1188 | 0.1188 | 0.1188 | 0.1191 | 0.1284 |
| Nac                              | 0.3395            | 0.3363 | 0.3363 | 0.3363 | 0.3363 | 0.3363 | 0.3395 |
| NarL                             | 0.1122            | 0.1055 | 0.1054 | 0.1054 | 0.1054 | 0.1055 | 0.1122 |
| NarP                             | 0.1480            | 0.1464 | 0.1464 | 0.1464 | 0.1464 | 0.1464 | 0.1480 |
| NtrC                             | 0.3916            | 0.3852 | 0.3852 | 0.3852 | 0.3852 | 0.3852 | 0.3916 |
| OmpR                             | 0.2978            | 0.2774 | 0.2768 | 0.2768 | 0.2768 | 0.2774 | 0.2978 |
| PdhR                             | 0.2395            | 0.2089 | 0.2031 | 0.2023 | 0.2031 | 0.2089 | 0.2395 |
| PhoP                             | 0.1992            | 0.1761 | 0.1734 | 0.1731 | 0.1734 | 0.1761 | 0.1992 |
| RstA                             | 0.3331            | 0.2911 | 0.2760 | 0.2723 | 0.2760 | 0.2911 | 0.3331 |
| YdeO                             | 0.4221            | 0.3775 | 0.3564 | 0.3502 | 0.3564 | 0.3775 | 0.4221 |



SUPPLEMENTARY TABLE S3B. ERRORS (TWO STANDARD DEVIATIONS) FOR ALL TRANSCRIPTION FACTORS EXPOSED TO CORM-3 UNDER ANAEROBIC GROWTH CONDITIONS

| <i>Transcription factor name</i> | <i>Time (min)</i> |        |        |        |        |        |        |
|----------------------------------|-------------------|--------|--------|--------|--------|--------|--------|
|                                  | 0                 | 2.5    | 5      | 10     | 20     | 40     | 80     |
| AraC                             | 0.2567            | 0.2233 | 0.2159 | 0.2146 | 0.2159 | 0.2233 | 0.2567 |
| ArcA                             | 0.1065            | 0.1047 | 0.1047 | 0.1047 | 0.1047 | 0.1047 | 0.1065 |
| CpxR                             | 0.1189            | 0.1183 | 0.1183 | 0.1183 | 0.1183 | 0.1183 | 0.1189 |
| CRP                              | 0.0524            | 0.0521 | 0.0521 | 0.0521 | 0.0521 | 0.0521 | 0.0524 |
| CusR                             | 0.3272            | 0.3007 | 0.2995 | 0.2994 | 0.2995 | 0.3007 | 0.3272 |
| DgsA                             | 0.2441            | 0.2237 | 0.2227 | 0.2227 | 0.2227 | 0.2237 | 0.2441 |
| EvgA                             | 0.2269            | 0.2112 | 0.2107 | 0.2107 | 0.2107 | 0.2112 | 0.2269 |
| Fis                              | 0.1022            | 0.1010 | 0.1010 | 0.1010 | 0.1010 | 0.1010 | 0.1022 |
| FlhDC                            | 0.1636            | 0.1589 | 0.1589 | 0.1589 | 0.1589 | 0.1589 | 0.1636 |
| FNR                              | 0.0797            | 0.0770 | 0.0770 | 0.0770 | 0.0770 | 0.0770 | 0.0797 |
| FruR                             | 0.1468            | 0.1393 | 0.1392 | 0.1392 | 0.1392 | 0.1393 | 0.1468 |
| Fur                              | 0.1304            | 0.1223 | 0.1221 | 0.1221 | 0.1221 | 0.1223 | 0.1304 |
| GadE                             | 0.2002            | 0.1951 | 0.1951 | 0.1951 | 0.1951 | 0.1951 | 0.2002 |
| GadWX                            | 0.1997            | 0.1980 | 0.1979 | 0.1979 | 0.1979 | 0.1980 | 0.1997 |
| GalR                             | 0.2907            | 0.2527 | 0.2418 | 0.2396 | 0.2418 | 0.2527 | 0.2907 |
| GalS                             | 0.3225            | 0.2984 | 0.2975 | 0.2974 | 0.2975 | 0.2984 | 0.3225 |
| GcvA                             | 0.3608            | 0.3514 | 0.3514 | 0.3514 | 0.3514 | 0.3514 | 0.3608 |
| GlcC                             | 0.2605            | 0.2265 | 0.2187 | 0.2174 | 0.2187 | 0.2265 | 0.2605 |
| HNS                              | 0.1088            | 0.1079 | 0.1079 | 0.1079 | 0.1079 | 0.1079 | 0.1088 |
| IclR                             | 0.4364            | 0.3907 | 0.3860 | 0.3855 | 0.3860 | 0.3907 | 0.4364 |
| IHF                              | 0.0674            | 0.0670 | 0.0670 | 0.0670 | 0.0670 | 0.0670 | 0.0674 |
| IscR                             | 0.1564            | 0.1519 | 0.1519 | 0.1519 | 0.1519 | 0.1519 | 0.1564 |
| Lrp                              | 0.1361            | 0.1331 | 0.1331 | 0.1331 | 0.1331 | 0.1331 | 0.1361 |
| MalT                             | 0.2362            | 0.2330 | 0.2330 | 0.2330 | 0.2330 | 0.2330 | 0.2362 |
| MarA                             | 0.2246            | 0.2079 | 0.2074 | 0.2073 | 0.2074 | 0.2079 | 0.2246 |
| MhpR                             | 0.3601            | 0.3166 | 0.2991 | 0.2946 | 0.2991 | 0.3166 | 0.3601 |
| ModE                             | 0.1217            | 0.1135 | 0.1133 | 0.1133 | 0.1133 | 0.1135 | 0.1217 |
| Nac                              | 0.2994            | 0.2892 | 0.2892 | 0.2892 | 0.2892 | 0.2892 | 0.2994 |
| NarL                             | 0.1069            | 0.1010 | 0.1009 | 0.1009 | 0.1009 | 0.1010 | 0.1069 |
| NarP                             | 0.1394            | 0.1369 | 0.1369 | 0.1369 | 0.1369 | 0.1369 | 0.1394 |
| NtrC                             | 0.2556            | 0.2507 | 0.2507 | 0.2507 | 0.2507 | 0.2507 | 0.2556 |
| OmpR                             | 0.2617            | 0.2572 | 0.2572 | 0.2572 | 0.2572 | 0.2572 | 0.2617 |
| PdhR                             | 0.2607            | 0.2503 | 0.2502 | 0.2502 | 0.2502 | 0.2503 | 0.2607 |
| PhoP                             | 0.2062            | 0.2001 | 0.2000 | 0.2000 | 0.2000 | 0.2001 | 0.2062 |
| RstA                             | 0.3215            | 0.3090 | 0.3088 | 0.3088 | 0.3088 | 0.3090 | 0.3215 |
| YdeO                             | 0.4135            | 0.3689 | 0.3481 | 0.3421 | 0.3481 | 0.3689 | 0.4135 |



SUPPLEMENTARY TABLE S4B. ERRORS (TWO STANDARD DEVIATIONS) FOR ALL TRANSCRIPTION FACTORS EXPOSED TO iCORM-3 UNDER ANAEROBIC GROWTH CONDITIONS

| <i>Transcription factor name</i> | <i>Time (min)</i> |        |        |        |        |        |        |
|----------------------------------|-------------------|--------|--------|--------|--------|--------|--------|
|                                  | 0                 | 2.5    | 5      | 10     | 20     | 40     | 80     |
| AraC                             | 0.2783            | 0.2418 | 0.2322 | 0.2304 | 0.2322 | 0.2418 | 0.2783 |
| ArcA                             | 0.1185            | 0.1171 | 0.1171 | 0.1171 | 0.1171 | 0.1171 | 0.1185 |
| CpxR                             | 0.1306            | 0.1301 | 0.1301 | 0.1301 | 0.1301 | 0.1301 | 0.1306 |
| CRP                              | 0.0555            | 0.0555 | 0.0555 | 0.0555 | 0.0555 | 0.0555 | 0.0555 |
| CusR                             | 0.3657            | 0.3397 | 0.3388 | 0.3388 | 0.3388 | 0.3397 | 0.3657 |
| DgsA                             | 0.2417            | 0.2398 | 0.2398 | 0.2398 | 0.2398 | 0.2398 | 0.2417 |
| EvgA                             | 0.2443            | 0.2443 | 0.2443 | 0.2443 | 0.2443 | 0.2443 | 0.2443 |
| Fis                              | 0.1085            | 0.1067 | 0.1067 | 0.1067 | 0.1067 | 0.1067 | 0.1085 |
| FlhDC                            | 0.1742            | 0.1718 | 0.1718 | 0.1718 | 0.1718 | 0.1718 | 0.1742 |
| FNR                              | 0.0877            | 0.0842 | 0.0841 | 0.0841 | 0.0841 | 0.0842 | 0.0877 |
| FruR                             | 0.1693            | 0.1664 | 0.1664 | 0.1664 | 0.1664 | 0.1664 | 0.1693 |
| Fur                              | 0.1454            | 0.1401 | 0.1401 | 0.1401 | 0.1401 | 0.1401 | 0.1454 |
| GadE                             | 0.1969            | 0.1743 | 0.1717 | 0.1715 | 0.1717 | 0.1743 | 0.1969 |
| GadWX                            | 0.2380            | 0.2333 | 0.2333 | 0.2333 | 0.2333 | 0.2333 | 0.2380 |
| GalR                             | 0.3148            | 0.2743 | 0.2610 | 0.2579 | 0.2610 | 0.2743 | 0.3148 |
| GalS                             | 0.2665            | 0.2317 | 0.2233 | 0.2218 | 0.2233 | 0.2317 | 0.2665 |
| GcvA                             | 0.2729            | 0.2709 | 0.2709 | 0.2709 | 0.2709 | 0.2709 | 0.2729 |
| GlcC                             | 0.2751            | 0.2391 | 0.2299 | 0.2281 | 0.2299 | 0.2391 | 0.2751 |
| HNS                              | 0.1196            | 0.1179 | 0.1179 | 0.1179 | 0.1179 | 0.1179 | 0.1196 |
| IclR                             | 0.4304            | 0.3860 | 0.3645 | 0.3582 | 0.3645 | 0.3860 | 0.4304 |
| IHF                              | 0.0696            | 0.0677 | 0.0677 | 0.0677 | 0.0677 | 0.0677 | 0.0696 |
| IscR                             | 0.1738            | 0.1706 | 0.1706 | 0.1706 | 0.1706 | 0.1706 | 0.1738 |
| Lrp                              | 0.1703            | 0.1684 | 0.1684 | 0.1684 | 0.1684 | 0.1684 | 0.1703 |
| MalT                             | 0.2993            | 0.2925 | 0.2925 | 0.2925 | 0.2925 | 0.2925 | 0.2993 |
| MarA                             | 0.2286            | 0.1999 | 0.1951 | 0.1944 | 0.1951 | 0.1999 | 0.2286 |
| MhpR                             | 0.3148            | 0.2743 | 0.2610 | 0.2579 | 0.2610 | 0.2743 | 0.3148 |
| ModE                             | 0.1344            | 0.1240 | 0.1237 | 0.1237 | 0.1237 | 0.1240 | 0.1344 |
| Nac                              | 0.4993            | 0.4866 | 0.4865 | 0.4865 | 0.4865 | 0.4866 | 0.4993 |
| NarL                             | 0.1128            | 0.1060 | 0.1059 | 0.1059 | 0.1059 | 0.1060 | 0.1128 |
| NarP                             | 0.1469            | 0.1342 | 0.1336 | 0.1336 | 0.1336 | 0.1342 | 0.1469 |
| NtrC                             | 0.2395            | 0.2389 | 0.2389 | 0.2389 | 0.2389 | 0.2389 | 0.2395 |
| OmpR                             | 0.2967            | 0.2703 | 0.2688 | 0.2687 | 0.2688 | 0.2703 | 0.2967 |
| PdhR                             | 0.2628            | 0.2535 | 0.2534 | 0.2534 | 0.2534 | 0.2535 | 0.2628 |
| PhoP                             | 0.2142            | 0.2105 | 0.2105 | 0.2105 | 0.2105 | 0.2105 | 0.2142 |
| RstA                             | 0.3358            | 0.3313 | 0.3312 | 0.3312 | 0.3312 | 0.3313 | 0.3358 |
| YdeO                             | 0.4304            | 0.3860 | 0.3645 | 0.3582 | 0.3645 | 0.3860 | 0.4304 |
